# Supplementary material
Source: Research Square preprint supplement (doi:10.21203/rs.3.rs-9423480/v1)
Supplement: Supplementary file 1 [file 1d01d23fd225e1365ddea00e.xlsx]

## Sheet: Spring fish
	Predation Strategy	Feeding Habit	Water Layer	Spawning Type	Mouth Position	Temperature Preference	Migratory	Fecundity
Spring-fish sp1	Hunter	Carnivorous	Lower	Aquatic plant attachment	Inferior mouth	Cold-water	Yes	3
Spring-fish sp2	Ambusher	Carnivorous	Mid-Lower	Nest guarding	Terminal mouth	Warm-water	No	3
Spring-fish sp3	Ambusher	Carnivorous	Pelagic	Pelagic eggs	Superior mouth	Warm-water	No	1
Spring-fish sp4	Hunter	Omnivorous	Upper	Aquatic plant attachment	Superior mouth	Warm-water	No	1
Spring-fish sp5	Hunter	Omnivorous	Upper	Aquatic plant attachment	Superior mouth	Warm-water	Yes	2
Spring-fish sp6	Hunter	Omnivorous	Benthic	Gravel substrate	Inferior mouth	Cold-water	No	1
Spring-fish sp7	Benthic Forager	Omnivorous	Benthic	Aquatic plant attachment	Inferior mouth	Warm-water	No	3
Spring-fish sp8	Benthic Forager	Omnivorous	Benthic	Aquatic plant attachment	Inferior mouth	Warm-water	No	3
Spring-fish sp9	Ambusher	Omnivorous	Benthic	Gravel substrate	Inferior mouth	Warm-water	No	2
Spring-fish sp10	Hunter	Herbivorous	Mid-Lower	Mussel spawning	Terminal mouth	Warm-water	No	1
Spring-fish sp11	Hunter	Herbivorous	Mid-Lower	Mussel spawning	Inferior mouth	Warm-water	No	1
Spring-fish sp12	Hunter	Omnivorous	Benthic	Aquatic plant attachment	Terminal mouth	Warm-water	No	3
Spring-fish sp13	Hunter	Omnivorous	Benthic	Aquatic plant attachment	Terminal mouth	Warm-water	No	3
Spring-fish sp14	Hunter	Carnivorous	Pelagic	Pelagic eggs	Superior mouth	Warm-water	No	3
Spring-fish sp15	Hunter	Carnivorous	Pelagic	Pelagic eggs	Superior mouth	Warm-water	No	3
Spring-fish sp16	Hunter	Herbivorous	Mid-Lower	Pelagic eggs	Terminal mouth	Warm-water	Yes	3
Spring-fish sp17	Hunter	Omnivorous	Benthic	Aquatic plant attachment	Inferior mouth	Warm-water	No	3
Spring-fish sp18	Ambusher	Carnivorous	Benthic	Aquatic plant attachment	Terminal mouth	Warm-water	No	3
Spring-fish sp19	Hunter	Omnivorous	Benthic	Gravel substrate	Inferior mouth	Warm-water	No	2
Spring-fish sp20	Hunter	Omnivorous	Mid-Lower	Aquatic plant attachment	Inferior mouth	Warm-water	No	1
Spring-fish sp21	Hunter	Omnivorous	Mid-Lower	Aquatic plant attachment	Inferior mouth	Warm-water	No	1
Spring-fish sp22	Hunter	Omnivorous	Upper	Aquatic plant attachment	Terminal mouth	Cold-water	No	3
Spring-fish sp23	Hunter	Omnivorous	Upper	Pelagic eggs	Terminal mouth	Warm-water	No	3
Spring-fish sp24	Filter Feeder	Omnivorous	Pelagic	Pelagic eggs	Terminal mouth	Warm-water	No	3
Spring-fish sp25	Hunter	Herbivorous	Mid-Lower	Aquatic plant attachment	Terminal mouth	Warm-water	No	3
Spring-fish sp26	Hunter	Carnivorous	Mid-Lower	Pelagic eggs	Terminal mouth	Warm-water	No	3
Spring-fish sp27	Hunter	Carnivorous	Pelagic	Gravel substrate	Anterior mouth	Warm-water	No	2
Spring-fish sp28	Grazer	Omnivorous	Pelagic	Aquatic plant attachment	Terminal mouth	Warm-water	No	3
Spring-fish sp29	Hunter	Omnivorous	Upper	Gravel substrate	Terminal mouth	Cold-water	No	2
Spring-fish sp30	Hunter	Omnivorous	Mid-Lower	Spawning under rocks	Superior mouth	Warm-water	No	1
Spring-fish sp31	Ambusher	Omnivorous	Mid-Lower	Mussel spawning	Terminal mouth	Warm-water	No	1
Spring-fish sp32	Hunter	Omnivorous	Benthic	Gravel substrate	Inferior mouth	Cold-water	No	1
Spring-fish sp33	Hunter	Omnivorous	Mid-Lower	Gravel substrate	Inferior mouth	Warm-water	No	2
Spring-fish sp34	Ambusher	Omnivorous	Mid-Lower	Aquatic plant attachment	Terminal mouth	Warm-water	Yes	3
Spring-fish sp35	Hunter	Omnivorous	Benthic	Spawning under rocks	Terminal mouth	Warm-water	No	1
Spring-fish sp36	Hunter	Omnivorous	Benthic	Spawning under rocks	Terminal mouth	Warm-water	No	1
Spring-fish sp37	Hunter	Omnivorous	Benthic	Spawning under rocks	Terminal mouth	Warm-water	No	1
Spring-fish sp38	Hunter	Omnivorous	Benthic	Spawning under rocks	Terminal mouth	Warm-water	No	1
Spring-fish sp39	Hunter	Omnivorous	Benthic	Spawning under rocks	Terminal mouth	Warm-water	No	1
Spring-fish sp40	Hunter	Omnivorous	Benthic	Spawning under rocks	Superior mouth	Warm-water	No	1
Spring-fish sp41	Ambusher	Carnivorous	Benthic	Nest guarding	Superior mouth	Cold-water	No	1
Spring-fish sp42	Ambusher	Omnivorous	Upper	Pelagic eggs	Inferior mouth	Warm-water	Yes	3
Spring-fish sp43	Hunter	Omnivorous	Mid-Lower	Pelagic eggs	Terminal mouth	Warm-water	No	3
Spring-fish sp44	Hunter	Carnivorous	Pelagic	Gravel substrate	Terminal mouth	Cold-water	No	3
Spring-fish sp45	Benthic Forager	Carnivorous	Benthic	Nest guarding	Inferior mouth	Warm-water	No	2
Spring-fish sp46	Benthic Forager	Carnivorous	Benthic	Aquatic plant attachment	Terminal mouth	Warm-water	No	3
Spring-fish sp47	Ambusher	Carnivorous	Benthic	Aquatic plant attachment	Terminal mouth	Warm-water	No	3
Spring-fish sp48	Benthic Forager	Omnivorous	Benthic	Aquatic plant attachment	Inferior mouth	Warm-water	No	3

## Sheet: Spring phytoplankton
	Habitat	Motility	Mucilaginous Envelope	Algal Morphology	Siliceous Wall Presence
Spring-phytoplankton sp1	Oligotrophic	Flagellated	Absent	Unicellular	Absent
Spring-phytoplankton sp2	Oligotrophic	Flagellated	Absent	Unicellular	Absent
Spring-phytoplankton sp3	Eutrophic	Non-flagellated	Absent	Unicellular	Absent
Spring-phytoplankton sp4	Eutrophic	Flagellated	Absent	Unicellular	Absent
Spring-phytoplankton sp5	Eutrophic	Flagellated	Absent	Unicellular	Absent
Spring-phytoplankton sp6	Mesotrophic	Non-flagellated	Absent	Unicellular	Present
Spring-phytoplankton sp7	Mesotrophic	Non-flagellated	Absent	Unicellular	Present
Spring-phytoplankton sp8	Mesotrophic	Non-flagellated	Absent	Unicellular	Present
Spring-phytoplankton sp9	Mesotrophic	Non-flagellated	Absent	Unicellular	Present
Spring-phytoplankton sp10	Oligotrophic	Non-flagellated	Absent	Unicellular	Present
Spring-phytoplankton sp11	Mesotrophic	Non-flagellated	Absent	Unicellular	Present
Spring-phytoplankton sp12	Eutrophic	Non-flagellated	Absent	Unicellular	Present
Spring-phytoplankton sp13	Mesotrophic	Non-flagellated	Absent	Unicellular	Present
Spring-phytoplankton sp14	Mesotrophic	Non-flagellated	Absent	Unicellular	Present
Spring-phytoplankton sp15	Mesotrophic	Non-flagellated	Absent	Unicellular	Present
Spring-phytoplankton sp16	Mesotrophic	Non-flagellated	Absent	Unicellular	Present
Spring-phytoplankton sp17	Mesotrophic	Non-flagellated	Absent	Unicellular	Present
Spring-phytoplankton sp18	Mesotrophic	Non-flagellated	Absent	Unicellular	Present
Spring-phytoplankton sp19	Oligotrophic	Non-flagellated	Absent	Unicellular	Present
Spring-phytoplankton sp20	Mesotrophic	Non-flagellated	Absent	Unicellular	Present
Spring-phytoplankton sp21	Mesotrophic	Non-flagellated	Absent	Unicellular	Present
Spring-phytoplankton sp22	Mesotrophic	Non-flagellated	Absent	Unicellular	Present
Spring-phytoplankton sp23	Mesotrophic	Non-flagellated	Absent	Unicellular	Present
Spring-phytoplankton sp24	Mesotrophic	Non-flagellated	Absent	Unicellular	Present
Spring-phytoplankton sp25	Mesotrophic	Non-flagellated	Absent	Unicellular	Present
Spring-phytoplankton sp26	Mesotrophic	Non-flagellated	Absent	Unicellular	Present
Spring-phytoplankton sp27	Mesotrophic	Non-flagellated	Absent	Unicellular	Present
Spring-phytoplankton sp28	Mesotrophic	Non-flagellated	Absent	Unicellular	Present
Spring-phytoplankton sp29	Oligotrophic	Non-flagellated	Absent	Unicellular	Present
Spring-phytoplankton sp30	Oligotrophic	Non-flagellated	Absent	Unicellular	Present
Spring-phytoplankton sp31	Mesotrophic	Non-flagellated	Absent	Unicellular	Present
Spring-phytoplankton sp32	Mesotrophic	Non-flagellated	Absent	Unicellular	Present
Spring-phytoplankton sp33	Mesotrophic	Non-flagellated	Absent	Unicellular	Present
Spring-phytoplankton sp34	Eutrophic	Non-flagellated	Absent	Unicellular	Present
Spring-phytoplankton sp35	Eutrophic	Non-flagellated	Absent	Unicellular	Present
Spring-phytoplankton sp36	Oligotrophic	Non-flagellated	Absent	Unicellular	Present
Spring-phytoplankton sp37	Mesotrophic	Non-flagellated	Present	Filamentous / Colonial chains	Present
Spring-phytoplankton sp38	Mesotrophic	Non-flagellated	Present	Filamentous / Colonial chains	Present
Spring-phytoplankton sp39	Mesotrophic	Non-flagellated	Absent	Unicellular	Present
Spring-phytoplankton sp40	Eutrophic	Non-flagellated	Absent	Filamentous / Colonial chains	Present
Spring-phytoplankton sp41	Eutrophic	Non-flagellated	Absent	Filamentous / Colonial chains	Present
Spring-phytoplankton sp42	Oligotrophic	Non-flagellated	Absent	Filamentous / Colonial chains	Present
Spring-phytoplankton sp43	Eutrophic	Non-flagellated	Absent	Filamentous / Colonial chains	Present
Spring-phytoplankton sp44	Eutrophic	Non-flagellated	Absent	Filamentous / Colonial chains	Present
Spring-phytoplankton sp45	Mesotrophic	Non-flagellated	Absent	Unicellular	Present
Spring-phytoplankton sp46	Eutrophic	Non-flagellated	Absent	Unicellular	Present
Spring-phytoplankton sp47	Eutrophic	Non-flagellated	Absent	Unicellular	Present
Spring-phytoplankton sp48	Mesotrophic	Non-flagellated	Absent	Filamentous / Colonial chains	Present
Spring-phytoplankton sp49	Oligotrophic	Flagellated	Absent	Unicellular	Absent
Spring-phytoplankton sp50	Mesotrophic	Non-flagellated	Absent	Unicellular	Absent
Spring-phytoplankton sp51	Oligotrophic	Non-flagellated	Absent	Unicellular	Absent
Spring-phytoplankton sp52	Mesotrophic	Flagellated	Absent	Unicellular	Absent
Spring-phytoplankton sp53	Eutrophic	Flagellated	Absent	Unicellular	Absent
Spring-phytoplankton sp54	Mesotrophic	Non-flagellated	Absent	Unicellular	Absent
Spring-phytoplankton sp55	Eutrophic	Flagellated	Absent	Unicellular	Absent
Spring-phytoplankton sp56	Oligotrophic	Non-flagellated	Absent	Unicellular	Absent
Spring-phytoplankton sp57	Mesotrophic	Flagellated	Absent	Unicellular	Absent
Spring-phytoplankton sp58	Mesotrophic	Flagellated	Absent	Unicellular	Absent
Spring-phytoplankton sp59	Mesotrophic	Flagellated	Absent	Unicellular	Absent
Spring-phytoplankton sp60	Mesotrophic	Flagellated	Absent	Unicellular	Absent
Spring-phytoplankton sp61	Mesotrophic	Flagellated	Absent	Unicellular	Absent
Spring-phytoplankton sp62	Eutrophic	Flagellated	Absent	Unicellular	Absent
Spring-phytoplankton sp63	Eutrophic	Flagellated	Absent	Unicellular	Absent
Spring-phytoplankton sp64	Oligotrophic	Flagellated	Absent	Unicellular	Absent
Spring-phytoplankton sp65	Oligotrophic	Flagellated	Absent	Colonial	Absent
Spring-phytoplankton sp66	Oligotrophic	Flagellated	Absent	Unicellular	Absent
Spring-phytoplankton sp67	Oligotrophic	Flagellated	Absent	Unicellular	Absent
Spring-phytoplankton sp68	Oligotrophic	Flagellated	Absent	Unicellular	Absent
Spring-phytoplankton sp69	Mesotrophic	Non-flagellated	Absent	Unicellular	Absent
Spring-phytoplankton sp70	Mesotrophic	Non-flagellated	Present	Colonial	Absent
Spring-phytoplankton sp71	Mesotrophic	Flagellated	Absent	Colonial	Absent
Spring-phytoplankton sp72	Oligotrophic	Flagellated	Absent	Unicellular	Absent
Spring-phytoplankton sp73	Oligotrophic	Flagellated	Absent	Unicellular	Absent
Spring-phytoplankton sp74	Oligotrophic	Flagellated	Absent	Unicellular	Absent
Spring-phytoplankton sp75	Oligotrophic	Flagellated	Absent	Unicellular	Absent
Spring-phytoplankton sp76	Oligotrophic	Flagellated	Absent	Unicellular	Absent
Spring-phytoplankton sp77	Oligotrophic	Flagellated	Absent	Unicellular	Absent
Spring-phytoplankton sp78	Oligotrophic	Flagellated	Absent	Unicellular	Absent
Spring-phytoplankton sp79	Oligotrophic	Flagellated	Absent	Unicellular	Absent
Spring-phytoplankton sp80	Mesotrophic	Flagellated	Absent	Unicellular	Absent
Spring-phytoplankton sp81	Mesotrophic	Non-flagellated	Present	Colonial	Absent
Spring-phytoplankton sp82	Oligotrophic	Non-flagellated	Absent	Filamentous / Colonial chains	Absent
Spring-phytoplankton sp83	Oligotrophic	Non-flagellated	Absent	Filamentous / Colonial chains	Absent
Spring-phytoplankton sp84	Oligotrophic	Flagellated	Absent	Unicellular	Absent
Spring-phytoplankton sp85	Oligotrophic	Non-flagellated	Present	Colonial	Absent
Spring-phytoplankton sp86	Oligotrophic	Non-flagellated	Present	Colonial	Absent
Spring-phytoplankton sp87	Oligotrophic	Flagellated	Absent	Colonial	Absent
Spring-phytoplankton sp88	Oligotrophic	Flagellated	Absent	Colonial	Absent
Spring-phytoplankton sp89	Mesotrophic	Flagellated	Absent	Unicellular	Absent
Spring-phytoplankton sp90	Mesotrophic	Flagellated	Absent	Unicellular	Absent
Spring-phytoplankton sp91	Mesotrophic	Non-flagellated	Present	Colonial	Absent
Spring-phytoplankton sp92	Mesotrophic	Non-flagellated	Absent	Filamentous / Colonial chains	Absent
Spring-phytoplankton sp93	Mesotrophic	Non-flagellated	Absent	Filamentous / Colonial chains	Absent
Spring-phytoplankton sp94	Mesotrophic	Non-flagellated	Absent	Filamentous / Colonial chains	Absent
Spring-phytoplankton sp95	Mesotrophic	Non-flagellated	Absent	Filamentous / Colonial chains	Absent
Spring-phytoplankton sp96	Mesotrophic	Non-flagellated	Absent	Filamentous / Colonial chains	Absent
Spring-phytoplankton sp97	Eutrophic	Non-flagellated	Absent	Filamentous / Colonial chains	Absent
Spring-phytoplankton sp98	Eutrophic	Non-flagellated	Absent	Filamentous / Colonial chains	Absent
Spring-phytoplankton sp99	Mesotrophic	Non-flagellated	Absent	Unicellular	Absent
Spring-phytoplankton sp100	Mesotrophic	Non-flagellated	Absent	Unicellular	Absent
Spring-phytoplankton sp101	Eutrophic	Non-flagellated	Present	Filamentous / Colonial chains	Absent
Spring-phytoplankton sp102	Mesotrophic	Flagellated	Absent	Unicellular	Absent
Spring-phytoplankton sp103	Mesotrophic	Flagellated	Absent	Unicellular	Absent
Spring-phytoplankton sp104	Mesotrophic	Flagellated	Absent	Unicellular	Absent
Spring-phytoplankton sp105	Mesotrophic	Flagellated	Absent	Unicellular	Absent
Spring-phytoplankton sp106	Mesotrophic	Flagellated	Absent	Unicellular	Absent
Spring-phytoplankton sp107	Mesotrophic	Flagellated	Absent	Unicellular	Absent
Spring-phytoplankton sp108	Mesotrophic	Flagellated	Absent	Unicellular	Absent
Spring-phytoplankton sp109	Eutrophic	Flagellated	Absent	Unicellular	Absent
Spring-phytoplankton sp110	Eutrophic	Flagellated	Absent	Unicellular	Absent
Spring-phytoplankton sp111	Eutrophic	Flagellated	Absent	Unicellular	Absent
Spring-phytoplankton sp112	Eutrophic	Flagellated	Absent	Unicellular	Absent
Spring-phytoplankton sp113	Eutrophic	Flagellated	Absent	Unicellular	Absent
Spring-phytoplankton sp114	Eutrophic	Flagellated	Absent	Unicellular	Absent
Spring-phytoplankton sp115	Eutrophic	Flagellated	Absent	Unicellular	Absent
Spring-phytoplankton sp116	Eutrophic	Flagellated	Absent	Unicellular	Absent
Spring-phytoplankton sp117	Eutrophic	Flagellated	Absent	Unicellular	Absent
Spring-phytoplankton sp118	Eutrophic	Flagellated	Absent	Unicellular	Absent
Spring-phytoplankton sp119	Mesotrophic	Flagellated	Present	Unicellular	Absent
Spring-phytoplankton sp120	Eutrophic	Flagellated	Absent	Unicellular	Absent
Spring-phytoplankton sp121	Eutrophic	Flagellated	Absent	Unicellular	Absent
Spring-phytoplankton sp122	Eutrophic	Flagellated	Absent	Unicellular	Absent
Spring-phytoplankton sp123	Eutrophic	Flagellated	Absent	Unicellular	Absent
Spring-phytoplankton sp124	Eutrophic	Flagellated	Absent	Unicellular	Absent
Spring-phytoplankton sp125	Eutrophic	Flagellated	Absent	Unicellular	Absent
Spring-phytoplankton sp126	Eutrophic	Flagellated	Absent	Unicellular	Absent
Spring-phytoplankton sp127	Eutrophic	Flagellated	Absent	Unicellular	Absent
Spring-phytoplankton sp128	Eutrophic	Flagellated	Absent	Unicellular	Absent
Spring-phytoplankton sp129	Eutrophic	Flagellated	Absent	Unicellular	Absent
Spring-phytoplankton sp130	Eutrophic	Flagellated	Absent	Unicellular	Absent
Spring-phytoplankton sp131	Eutrophic	Flagellated	Absent	Unicellular	Absent
Spring-phytoplankton sp132	Eutrophic	Flagellated	Absent	Unicellular	Absent
Spring-phytoplankton sp133	Eutrophic	Flagellated	Absent	Unicellular	Absent
Spring-phytoplankton sp134	Eutrophic	Flagellated	Absent	Unicellular	Absent
Spring-phytoplankton sp135	Mesotrophic	Flagellated	Absent	Unicellular	Absent
Spring-phytoplankton sp136	Mesotrophic	Flagellated	Absent	Unicellular	Absent
Spring-phytoplankton sp137	Mesotrophic	Flagellated	Absent	Unicellular	Absent
Spring-phytoplankton sp138	Mesotrophic	Flagellated	Absent	Filamentous / Colonial chains	Absent
Spring-phytoplankton sp139	Mesotrophic	Flagellated	Absent	Filamentous / Colonial chains	Absent
Spring-phytoplankton sp140	Mesotrophic	Non-flagellated	Present	Unicellular	Absent
Spring-phytoplankton sp141	Oligotrophic	Non-flagellated	Absent	Unicellular	Absent
Spring-phytoplankton sp142	Eutrophic	Non-flagellated	Absent	Filamentous / Colonial chains	Absent
Spring-phytoplankton sp143	Eutrophic	Non-flagellated	Absent	Unicellular	Absent
Spring-phytoplankton sp144	Mesotrophic	Non-flagellated	Absent	Unicellular	Absent
Spring-phytoplankton sp145	Mesotrophic	Non-flagellated	Absent	Colonial	Absent
Spring-phytoplankton sp146	Mesotrophic	Non-flagellated	Absent	Colonial	Absent
Spring-phytoplankton sp147	Mesotrophic	Non-flagellated	Absent	Unicellular	Absent
Spring-phytoplankton sp148	Mesotrophic	Non-flagellated	Absent	Filamentous / Colonial chains	Absent
Spring-phytoplankton sp149	Eutrophic	Flagellated	Absent	Unicellular	Absent
Spring-phytoplankton sp150	Mesotrophic	Non-flagellated	Absent	Unicellular	Absent
Spring-phytoplankton sp151	Mesotrophic	Non-flagellated	Present	Colonial	Absent
Spring-phytoplankton sp152	Mesotrophic	Non-flagellated	Present	Colonial	Absent
Spring-phytoplankton sp153	Mesotrophic	Non-flagellated	Absent	Unicellular	Absent
Spring-phytoplankton sp154	Eutrophic	Non-flagellated	Absent	Unicellular	Absent
Spring-phytoplankton sp155	Eutrophic	Non-flagellated	Absent	Unicellular	Absent
Spring-phytoplankton sp156	Mesotrophic	Non-flagellated	Absent	Unicellular	Absent
Spring-phytoplankton sp157	Mesotrophic	Non-flagellated	Absent	Unicellular	Absent
Spring-phytoplankton sp158	Eutrophic	Non-flagellated	Present	Unicellular	Absent
Spring-phytoplankton sp159	Oligotrophic	Non-flagellated	Absent	Unicellular	Absent
Spring-phytoplankton sp160	Oligotrophic	Non-flagellated	Absent	Unicellular	Absent
Spring-phytoplankton sp161	Mesotrophic	Non-flagellated	Absent	Unicellular	Absent
Spring-phytoplankton sp162	Mesotrophic	Non-flagellated	Absent	Filamentous / Colonial chains	Absent
Spring-phytoplankton sp163	Mesotrophic	Non-flagellated	Absent	Filamentous / Colonial chains	Absent
Spring-phytoplankton sp164	Mesotrophic	Non-flagellated	Absent	Filamentous / Colonial chains	Absent
Spring-phytoplankton sp165	Mesotrophic	Non-flagellated	Absent	Filamentous / Colonial chains	Absent
Spring-phytoplankton sp166	Eutrophic	Non-flagellated	Absent	Filamentous / Colonial chains	Absent
Spring-phytoplankton sp167	Eutrophic	Non-flagellated	Absent	Filamentous / Colonial chains	Absent
Spring-phytoplankton sp168	Mesotrophic	Non-flagellated	Absent	Unicellular	Absent
Spring-phytoplankton sp169	Mesotrophic	Non-flagellated	Absent	Unicellular	Absent
Spring-phytoplankton sp170	Mesotrophic	Flagellated	Absent	Colonial	Absent
Spring-phytoplankton sp171	Mesotrophic	Flagellated	Absent	Unicellular	Absent
Spring-phytoplankton sp172	Mesotrophic	Flagellated	Absent	Unicellular	Absent
Spring-phytoplankton sp173	Mesotrophic	Flagellated	Absent	Unicellular	Absent
Spring-phytoplankton sp174	Mesotrophic	Flagellated	Absent	Unicellular	Absent
Spring-phytoplankton sp175	Mesotrophic	Non-flagellated	Absent	Unicellular	Present
Spring-phytoplankton sp176	Eutrophic	Non-flagellated	Present	Filamentous / Colonial chains	Absent
Spring-phytoplankton sp177	Mesotrophic	Flagellated	Absent	Unicellular	Absent
Spring-phytoplankton sp178	Mesotrophic	Flagellated	Absent	Unicellular	Absent
Spring-phytoplankton sp179	Mesotrophic	Flagellated	Absent	Unicellular	Absent
Spring-phytoplankton sp180	Mesotrophic	Flagellated	Absent	Unicellular	Absent
Spring-phytoplankton sp181	Mesotrophic	Flagellated	Absent	Unicellular	Absent
Spring-phytoplankton sp182	Mesotrophic	Flagellated	Absent	Unicellular	Absent
Spring-phytoplankton sp183	Mesotrophic	Flagellated	Absent	Unicellular	Absent
Spring-phytoplankton sp184	Mesotrophic	Flagellated	Absent	Unicellular	Absent
Spring-phytoplankton sp185	Mesotrophic	Flagellated	Absent	Unicellular	Absent
Spring-phytoplankton sp186	Mesotrophic	Flagellated	Absent	Unicellular	Absent
Spring-phytoplankton sp187	Mesotrophic	Flagellated	Absent	Unicellular	Absent
Spring-phytoplankton sp188	Mesotrophic	Flagellated	Absent	Unicellular	Absent
Spring-phytoplankton sp189	Mesotrophic	Flagellated	Absent	Unicellular	Absent
Spring-phytoplankton sp190	Mesotrophic	Flagellated	Absent	Unicellular	Absent
Spring-phytoplankton sp191	Mesotrophic	Flagellated	Absent	Unicellular	Absent
Spring-phytoplankton sp192	Mesotrophic	Non-flagellated	Absent	Colonial	Absent
Spring-phytoplankton sp193	Mesotrophic	Non-flagellated	Present	Colonial	Absent
Spring-phytoplankton sp194	Mesotrophic	Non-flagellated	Absent	Unicellular	Absent
Spring-phytoplankton sp195	Mesotrophic	Non-flagellated	Absent	Unicellular	Absent
Spring-phytoplankton sp196	Mesotrophic	Non-flagellated	Absent	Unicellular	Absent
Spring-phytoplankton sp197	Mesotrophic	Non-flagellated	Absent	Unicellular	Absent
Spring-phytoplankton sp198	Mesotrophic	Non-flagellated	Absent	Unicellular	Absent
Spring-phytoplankton sp199	Mesotrophic	Flagellated	Absent	Unicellular	Absent
Spring-phytoplankton sp200	Mesotrophic	Flagellated	Absent	Unicellular	Absent
Spring-phytoplankton sp201	Oligotrophic	Flagellated	Absent	Unicellular	Absent
Spring-phytoplankton sp202	Oligotrophic	Flagellated	Absent	Unicellular	Absent
Spring-phytoplankton sp203	Mesotrophic	Flagellated	Absent	Unicellular	Absent
Spring-phytoplankton sp204	Mesotrophic	Flagellated	Absent	Unicellular	Absent
Spring-phytoplankton sp205	Mesotrophic	Flagellated	Absent	Unicellular	Absent
Spring-phytoplankton sp206	Mesotrophic	Flagellated	Absent	Unicellular	Absent
Spring-phytoplankton sp207	Mesotrophic	Flagellated	Absent	Unicellular	Absent
Spring-phytoplankton sp208	Mesotrophic	Flagellated	Absent	Unicellular	Absent
Spring-phytoplankton sp209	Mesotrophic	Flagellated	Absent	Unicellular	Absent
Spring-phytoplankton sp210	Mesotrophic	Flagellated	Absent	Unicellular	Absent
Spring-phytoplankton sp211	Mesotrophic	Flagellated	Absent	Unicellular	Absent
Spring-phytoplankton sp212	Mesotrophic	Flagellated	Absent	Unicellular	Absent

## Sheet: Spring zooplankton
	Feeding Type	Trophic Group	Reproductive Mode	Life Cycle Duration	Locomotion Mode
Spring-zooplankton sp1	Filter-feeder	Phytophagous / Herbivorous	Asexual	Short	Planktonic
Spring-zooplankton sp2	Filter-feeder	Phytophagous / Herbivorous	Asexual	Short	Planktonic
Spring-zooplankton sp3	Filter-feeder	Phytophagous / Herbivorous	Asexual	Short	Planktonic
Spring-zooplankton sp4	Filter-feeder	Phytophagous / Herbivorous	Asexual	Short	Planktonic
Spring-zooplankton sp5	Filter-feeder	Omnivorous	Asexual	Short	Planktonic
Spring-zooplankton sp6	Filter-feeder	Omnivorous	Asexual	Short	Planktonic
Spring-zooplankton sp7	Filter-feeder	Omnivorous	Sexual	Long	Planktonic
Spring-zooplankton sp8	Filter-feeder	Omnivorous	Sexual	Long	Planktonic
Spring-zooplankton sp9	Filter-feeder	Omnivorous	Sexual	Long	Planktonic
Spring-zooplankton sp10	Filter-feeder	Phytophagous / Herbivorous	Sexual	Long	Planktonic
Spring-zooplankton sp11	Filter-feeder	Phytophagous / Herbivorous	Sexual	Long	Planktonic
Spring-zooplankton sp12	Carnivore	Omnivorous	Sexual	Long	Planktonic
Spring-zooplankton sp13	Carnivore	Omnivorous	Sexual	Long	Planktonic
Spring-zooplankton sp14	Carnivore	Carnivorous	Sexual	Long	Planktonic
Spring-zooplankton sp15	Carnivore	Carnivorous	Sexual	Long	Planktonic
Spring-zooplankton sp16	Carnivore	Carnivorous	Sexual	Long	Planktonic
Spring-zooplankton sp17	Carnivore	Carnivorous	Sexual	Long	Planktonic
Spring-zooplankton sp18	Carnivore	Carnivorous	Sexual	Long	Planktonic
Spring-zooplankton sp19	Carnivore	Carnivorous	Sexual	Long	Planktonic
Spring-zooplankton sp20	Carnivore	Carnivorous	Sexual	Long	Planktonic
Spring-zooplankton sp21	Carnivore	Carnivorous	Sexual	Long	Planktonic
Spring-zooplankton sp22	Filter-feeder	Omnivorous	Sexual	Long	Planktonic
Spring-zooplankton sp23	Predator	Omnivorous	Sexual	Long	Planktonic
Spring-zooplankton sp24	Predator	Omnivorous	Sexual	Long	Planktonic
Spring-zooplankton sp25	Predator	Omnivorous	Sexual	Long	Planktonic
Spring-zooplankton sp26	Predator	Omnivorous	Sexual	Long	Planktonic
Spring-zooplankton sp27	Suctorian	Fungivorous / Bacterivorous	Asexual	Short	Planktonic
Spring-zooplankton sp28	Suctorian	Fungivorous / Bacterivorous	Asexual	Short	Planktonic
Spring-zooplankton sp29	Suctorian	Carnivorous	Asexual	Short	Attached
Spring-zooplankton sp30	Filter-feeder	Fungivorous / Bacterivorous	Asexual	Short	Facultatively Planktonic
Spring-zooplankton sp31	Filter-feeder	Omnivorous	Asexual	Short	Planktonic
Spring-zooplankton sp32	Predator	Carnivorous	Asexual	Short	Planktonic
Spring-zooplankton sp33	Predator	Carnivorous	Asexual	Short	Attached
Spring-zooplankton sp34	Predator	Carnivorous	Asexual	Short	Attached
Spring-zooplankton sp35	Predator	Carnivorous	Asexual	Short	Attached
Spring-zooplankton sp36	Predator	Carnivorous	Asexual	Short	Attached
Spring-zooplankton sp37	Predator	Carnivorous	Asexual	Short	Attached
Spring-zooplankton sp38	Predator	Carnivorous	Asexual	Short	Attached
Spring-zooplankton sp39	Predator	Carnivorous	Asexual	Short	Attached
Spring-zooplankton sp40	Predator	Carnivorous	Asexual	Short	Attached
Spring-zooplankton sp41	Predator	Carnivorous	Asexual	Short	Attached
Spring-zooplankton sp42	Filter-feeder	Fungivorous / Bacterivorous	Asexual	Short	Attached
Spring-zooplankton sp43	Predator	Carnivorous	Asexual	Short	Facultatively Planktonic
Spring-zooplankton sp44	Predator	Carnivorous	Asexual	Short	Attached
Spring-zooplankton sp45	Predator	Carnivorous	Asexual	Short	Planktonic
Spring-zooplankton sp46	Predator	Carnivorous	Asexual	Short	Planktonic
Spring-zooplankton sp47	Filter-feeder	Omnivorous	Asexual	Short	Planktonic
Spring-zooplankton sp48	Filter-feeder	Omnivorous	Asexual	Short	Planktonic
Spring-zooplankton sp49	Filter-feeder	Fungivorous / Bacterivorous	Asexual	Short	Attached
Spring-zooplankton sp50	Filter-feeder	Fungivorous / Bacterivorous	Asexual	Short	Planktonic
Spring-zooplankton sp51	Filter-feeder	Omnivorous	Asexual	Short	Planktonic
Spring-zooplankton sp52	Filter-feeder	Omnivorous	Asexual	Short	Planktonic
Spring-zooplankton sp53	Predator	Carnivorous	Asexual	Short	Planktonic
Spring-zooplankton sp54	Predator	Carnivorous	Asexual	Short	Planktonic
Spring-zooplankton sp55	Predator	Carnivorous	Asexual	Short	Planktonic
Spring-zooplankton sp56	Filter-feeder	Omnivorous	Asexual	Short	Planktonic
Spring-zooplankton sp57	Predator	Carnivorous	Asexual	Short	Attached
Spring-zooplankton sp58	Filter-feeder	Fungivorous / Bacterivorous	Asexual	Short	Planktonic
Spring-zooplankton sp59	Filter-feeder	Omnivorous	Asexual	Short	Planktonic
Spring-zooplankton sp60	Filter-feeder	Omnivorous	Asexual	Short	Planktonic
Spring-zooplankton sp61	Predator	Carnivorous	Asexual	Short	Planktonic
Spring-zooplankton sp62	Predator	Carnivorous	Asexual	Short	Planktonic
Spring-zooplankton sp63	Predator	Carnivorous	Asexual	Short	Planktonic
Spring-zooplankton sp64	Predator	Carnivorous	Asexual	Short	Planktonic
Spring-zooplankton sp65	Filter-feeder	Phytophagous / Herbivorous	Asexual	Short	Planktonic
Spring-zooplankton sp66	Filter-feeder	Phytophagous / Herbivorous	Asexual	Short	Facultatively Planktonic
Spring-zooplankton sp67	Filter-feeder	Phytophagous / Herbivorous	Asexual	Short	Facultatively Planktonic
Spring-zooplankton sp68	Filter-feeder	Phytophagous / Herbivorous	Asexual	Short	Facultatively Planktonic
Spring-zooplankton sp69	Filter-feeder	Phytophagous / Herbivorous	Asexual	Short	Planktonic
Spring-zooplankton sp70	Filter-feeder	Phytophagous / Herbivorous	Asexual	Short	Planktonic
Spring-zooplankton sp71	Filter-feeder	Phytophagous / Herbivorous	Asexual	Short	Planktonic
Spring-zooplankton sp72	Filter-feeder	Phytophagous / Herbivorous	Asexual	Short	Planktonic
Spring-zooplankton sp73	Filter-feeder	Phytophagous / Herbivorous	Asexual	Short	Planktonic
Spring-zooplankton sp74	Filter-feeder	Phytophagous / Herbivorous	Asexual	Short	Planktonic
Spring-zooplankton sp75	Filter-feeder	Omnivorous	Asexual	Short	Facultatively Planktonic
Spring-zooplankton sp76	Filter-feeder	Omnivorous	Asexual	Short	Planktonic
Spring-zooplankton sp77	Filter-feeder	Omnivorous	Asexual	Short	Planktonic
Spring-zooplankton sp78	Suctorian	Omnivorous	Asexual	Short	Planktonic
Spring-zooplankton sp79	Suctorian	Omnivorous	Asexual	Short	Planktonic
Spring-zooplankton sp80	Suctorian	Omnivorous	Asexual	Short	Planktonic
Spring-zooplankton sp81	Suctorian	Omnivorous	Asexual	Short	Planktonic
Spring-zooplankton sp82	Suctorian	Omnivorous	Asexual	Short	Planktonic
Spring-zooplankton sp83	Suctorian	Omnivorous	Asexual	Short	Planktonic
Spring-zooplankton sp84	Suctorian	Omnivorous	Asexual	Short	Planktonic
Spring-zooplankton sp85	Suctorian	Omnivorous	Asexual	Short	Planktonic
Spring-zooplankton sp86	Suctorian	Omnivorous	Asexual	Short	Planktonic
Spring-zooplankton sp87	Suctorian	Omnivorous	Asexual	Short	Planktonic
Spring-zooplankton sp88	Suctorian	Omnivorous	Asexual	Short	Planktonic
Spring-zooplankton sp89	Suctorian	Omnivorous	Asexual	Short	Planktonic
Spring-zooplankton sp90	Suctorian	Omnivorous	Asexual	Short	Planktonic
Spring-zooplankton sp91	Suctorian	Omnivorous	Asexual	Short	Planktonic
Spring-zooplankton sp92	Carnivore	Omnivorous	Asexual	Short	Planktonic
Spring-zooplankton sp93	Carnivore	Omnivorous	Asexual	Short	Planktonic
Spring-zooplankton sp94	Carnivore	Omnivorous	Asexual	Short	Planktonic
Spring-zooplankton sp95	Carnivore	Omnivorous	Asexual	Short	Planktonic
Spring-zooplankton sp96	Carnivore	Omnivorous	Asexual	Short	Planktonic
Spring-zooplankton sp97	Carnivore	Omnivorous	Asexual	Short	Planktonic

## Sheet: Spring  macroinvertebrates
	Life	Size at maturity	Occu/Drft	Swim	Rheo	Temp/ther	Resp	Feed/trop	Habi	Adult aerial dispersal	Armouring		Life			Size at maturity			Occu/Drft			Swim				Rheo			Temp/ther			Resp			Feed/trop						Habi						Adult aerial dispersal		Armouring
Spring-benthic macroinvertebrates sp1	1	3	3	4	1	2	2	1	1	1	1		<1 week	<1 month	>1 month	Small (< 9 mm)	Medium (9-16 mm)	Large(> 16 mm)	Rare	Common	Abundant	Weak	Medium	Strong	None	Depositional only	Depositional and erosional	Erosional	Cool	Cool/warm eurythermal	Warm	tegumentary	Branchial	Air(spiracles,tracheae, plastrons)	Collector-gatherers	Collector-filterers	Scrapers	Predators	Shredders	Deposit feeder	Climbers	Burrowers	Sprawlers	Clingers	Swimmers	Skate	Yes	No	None (soft-bodied forms)
Spring-benthic macroinvertebrates sp2	1	3	3	4	1	2	2	1	1	1	1
Spring-benthic macroinvertebrates sp3	1	1	3	4	2	1	1	1	1	1	1
Spring-benthic macroinvertebrates sp4	1	1	3	4	2	1	1	1	1	1	1
Spring-benthic macroinvertebrates sp5	2	1	3	4	1	2	2	1	1	1	1
Spring-benthic macroinvertebrates sp6	1	2	3	3	2	2	1	4	6	1	1
Spring-benthic macroinvertebrates sp7	1	1	3	4	2	1	2	1	1	1	1
Spring-benthic macroinvertebrates sp8	2	2	3	4	1	2	1	1	1	1	1
Spring-benthic macroinvertebrates sp9	2	2	3	4	1	2	1	1	1	1	1
Spring-benthic macroinvertebrates sp10	1	1	3	4	2	1	1	1	1	1	1
Spring-benthic macroinvertebrates sp11	2	1	3	4	1	2	1	1	1	1	1
Spring-benthic macroinvertebrates sp12	3	1	4	4	1	2	1	2	4	2	1
Spring-benthic macroinvertebrates sp13	3	1	1	2	1	2	1	4	4	2	1
Spring-benthic macroinvertebrates sp14	3	1	1	2	1	2	1	4	4	2	1
Spring-benthic macroinvertebrates sp15	3	3	1	1	1	2	2	2	3	2	3
Spring-benthic macroinvertebrates sp16	3	3	1	1	1	3	2	2	3	2	3
Spring-benthic macroinvertebrates sp17	3	3	1	4	1	3	3	3	4	2	3
[truncated: 2 more columns]

## Sheet: Autumn fish
	Predation Strategy	Feeding Habit	Water Layer	Spawning Type	Mouth Position	Temperature Preference	Migratory	Fecundity
Autumn-fish sp1	Ambusher	Carnivorous	Mid-Lower	Nest guarding	Terminal mouth	Warm-water	No	3
Autumn-fish sp2	Ambusher	Carnivorous	Pelagic	Pelagic eggs	Superior mouth	Warm-water	No	1
Autumn-fish sp3	Hunter	Omnivorous	Upper	Aquatic plant attachment	Superior mouth	Warm-water	No	1
Autumn-fish sp4	Hunter	Omnivorous	Upper	Aquatic plant attachment	Superior mouth	Warm-water	Yes	2
Autumn-fish sp5	Hunter	Omnivorous	Benthic	Gravel substrate	Inferior mouth	Cold-water	No	1
Autumn-fish sp6	Benthic Forager	Omnivorous	Benthic	Aquatic plant attachment	Inferior mouth	Warm-water	No	3
Autumn-fish sp7	Benthic Forager	Omnivorous	Benthic	Aquatic plant attachment	Inferior mouth	Warm-water	No	3
Autumn-fish sp8	Ambusher	Omnivorous	Benthic	Gravel substrate	Inferior mouth	Warm-water	No	2
Autumn-fish sp9	Hunter	Herbivorous	Mid-Lower	Mussel spawning	Terminal mouth	Warm-water	No	1
Autumn-fish sp10	Hunter	Herbivorous	Mid-Lower	Mussel spawning	Inferior mouth	Warm-water	No	1
Autumn-fish sp11	Hunter	Omnivorous	Benthic	Aquatic plant attachment	Terminal mouth	Warm-water	No	3
Autumn-fish sp12	Hunter	Carnivorous	Pelagic	Pelagic eggs	Superior mouth	Warm-water	No	3
Autumn-fish sp13	Hunter	Carnivorous	Pelagic	Pelagic eggs	Superior mouth	Warm-water	No	3
Autumn-fish sp14	Hunter	Herbivorous	Mid-Lower	Pelagic eggs	Terminal mouth	Warm-water	Yes	3
Autumn-fish sp15	Hunter	Carnivorous	Pelagic	Pelagic eggs	Superior mouth	Warm-water	No	3
Autumn-fish sp16	Hunter	Omnivorous	Benthic	Aquatic plant attachment	Inferior mouth	Warm-water	No	3
Autumn-fish sp17	Ambusher	Carnivorous	Benthic	Aquatic plant attachment	Terminal mouth	Warm-water	No	3
Autumn-fish sp18	Hunter	Omnivorous	Benthic	Gravel substrate	Inferior mouth	Warm-water	No	2
Autumn-fish sp19	Hunter	Omnivorous	Mid-Lower	Aquatic plant attachment	Inferior mouth	Warm-water	No	1
Autumn-fish sp20	Hunter	Omnivorous	Upper	Aquatic plant attachment	Terminal mouth	Cold-water	No	3
Autumn-fish sp21	Hunter	Omnivorous	Upper	Pelagic eggs	Terminal mouth	Warm-water	No	3
Autumn-fish sp22	Filter Feeder	Omnivorous	Pelagic	Pelagic eggs	Terminal mouth	Warm-water	No	3
Autumn-fish sp23	Hunter	Herbivorous	Mid-Lower	Aquatic plant attachment	Terminal mouth	Warm-water	No	3
Autumn-fish sp24	Hunter	Carnivorous	Mid-Lower	Pelagic eggs	Terminal mouth	Warm-water	No	3
Autumn-fish sp25	Hunter	Carnivorous	Pelagic	Gravel substrate	Anterior mouth	Warm-water	No	2
Autumn-fish sp26	Hunter	Omnivorous	Mid-Lower	Gravel substrate	Inferior mouth	Cold-water	No	1
Autumn-fish sp27	Grazer	Omnivorous	Pelagic	Aquatic plant attachment	Terminal mouth	Warm-water	No	3
Autumn-fish sp28	Hunter	Omnivorous	Mid-Lower	Spawning under rocks	Superior mouth	Warm-water	No	1
Autumn-fish sp29	Ambusher	Omnivorous	Mid-Lower	Mussel spawning	Terminal mouth	Warm-water	No	1
Autumn-fish sp30	Hunter	Omnivorous	Mid-Lower	Gravel substrate	Inferior mouth	Warm-water	No	2
Autumn-fish sp31	Ambusher	Omnivorous	Mid-Lower	Aquatic plant attachment	Terminal mouth	Warm-water	Yes	3
Autumn-fish sp32	Hunter	Omnivorous	Pelagic	Pelagic eggs	Terminal mouth	Warm-water	Yes	3
Autumn-fish sp33	Hunter	Omnivorous	Benthic	Spawning under rocks	Terminal mouth	Warm-water	No	1
Autumn-fish sp34	Hunter	Omnivorous	Benthic	Spawning under rocks	Terminal mouth	Warm-water	No	1
Autumn-fish sp35	Hunter	Omnivorous	Benthic	Spawning under rocks	Terminal mouth	Warm-water	No	1
Autumn-fish sp36	Hunter	Omnivorous	Benthic	Spawning under rocks	Terminal mouth	Warm-water	No	1
Autumn-fish sp37	Hunter	Omnivorous	Benthic	Spawning under rocks	Terminal mouth	Warm-water	No	1
Autumn-fish sp38	Hunter	Omnivorous	Benthic	Spawning under rocks	Superior mouth	Warm-water	No	1
Autumn-fish sp39	Hunter	Omnivorous	Mid-Lower	Pelagic eggs	Terminal mouth	Warm-water	No	3
Autumn-fish sp40	Hunter	Carnivorous	Pelagic	Gravel substrate	Terminal mouth	Cold-water	No	3
Autumn-fish sp41	Ambusher	Carnivorous	Mid-Lower	Aquatic plant attachment	Terminal mouth	Cold-water	No	1
Autumn-fish sp42	Benthic Forager	Carnivorous	Benthic	Nest guarding	Inferior mouth	Warm-water	No	2
Autumn-fish sp43	Ambusher	Carnivorous	Benthic	Aquatic plant attachment	Terminal mouth	Warm-water	No	3
Autumn-fish sp44	Ambusher	Carnivorous	Benthic	Aquatic plant attachment	Terminal mouth	Warm-water	No	1

## Sheet: Autumn phytoplankton
	Habitat	Motility	Mucilaginous Envelope	Algal Morphology	Siliceous Wall Presence
Autumn-phytoplankton sp1	Oligotrophic	Flagellated	Absent	Unicellular	Absent
Autumn-phytoplankton sp2	Mesotrophic	Flagellated	Absent	Unicellular	Absent
Autumn-phytoplankton sp3	Oligotrophic	Flagellated	Absent	Colonial	Absent
Autumn-phytoplankton sp4	Eutrophic	Flagellated	Absent	Unicellular	Absent
Autumn-phytoplankton sp5	Eutrophic	Non-flagellated	Absent	Unicellular	Present
Autumn-phytoplankton sp6	Mesotrophic	Non-flagellated	Absent	Unicellular	Present
Autumn-phytoplankton sp7	Oligotrophic	Non-flagellated	Absent	Unicellular	Present
Autumn-phytoplankton sp8	Eutrophic	Non-flagellated	Absent	Unicellular	Present
Autumn-phytoplankton sp9	Eutrophic	Non-flagellated	Absent	Unicellular	Present
Autumn-phytoplankton sp10	Mesotrophic	Non-flagellated	Absent	Unicellular	Present
Autumn-phytoplankton sp11	Mesotrophic	Non-flagellated	Absent	Unicellular	Present
Autumn-phytoplankton sp12	Mesotrophic	Non-flagellated	Absent	Unicellular	Present
Autumn-phytoplankton sp13	Mesotrophic	Non-flagellated	Absent	Unicellular	Present
Autumn-phytoplankton sp14	Mesotrophic	Non-flagellated	Absent	Unicellular	Present
Autumn-phytoplankton sp15	Mesotrophic	Non-flagellated	Absent	Unicellular	Present
Autumn-phytoplankton sp16	Mesotrophic	Non-flagellated	Absent	Unicellular	Present
Autumn-phytoplankton sp17	Mesotrophic	Non-flagellated	Absent	Unicellular	Present
Autumn-phytoplankton sp18	Mesotrophic	Non-flagellated	Present	Unicellular	Present
Autumn-phytoplankton sp19	Mesotrophic	Non-flagellated	Present	Unicellular	Present
Autumn-phytoplankton sp20	Mesotrophic	Non-flagellated	Present	Unicellular	Present
Autumn-phytoplankton sp21	Mesotrophic	Non-flagellated	Absent	Unicellular	Present
Autumn-phytoplankton sp22	Mesotrophic	Non-flagellated	Absent	Unicellular	Present
Autumn-phytoplankton sp23	Mesotrophic	Non-flagellated	Absent	Unicellular	Present
Autumn-phytoplankton sp24	Mesotrophic	Non-flagellated	Absent	Unicellular	Present
Autumn-phytoplankton sp25	Mesotrophic	Non-flagellated	Absent	Unicellular	Present
Autumn-phytoplankton sp26	Oligotrophic	Non-flagellated	Absent	Unicellular	Present
Autumn-phytoplankton sp27	Mesotrophic	Non-flagellated	Absent	Unicellular	Present
Autumn-phytoplankton sp28	Mesotrophic	Non-flagellated	Absent	Unicellular	Present
Autumn-phytoplankton sp29	Mesotrophic	Non-flagellated	Absent	Unicellular	Present
Autumn-phytoplankton sp30	Mesotrophic	Non-flagellated	Absent	Unicellular	Present
Autumn-phytoplankton sp31	Mesotrophic	Non-flagellated	Absent	Unicellular	Present
Autumn-phytoplankton sp32	Mesotrophic	Non-flagellated	Absent	Unicellular	Present
Autumn-phytoplankton sp33	Mesotrophic	Non-flagellated	Absent	Unicellular	Present
Autumn-phytoplankton sp34	Mesotrophic	Non-flagellated	Absent	Unicellular	Present
Autumn-phytoplankton sp35	Mesotrophic	Non-flagellated	Absent	Unicellular	Present
Autumn-phytoplankton sp36	Mesotrophic	Non-flagellated	Absent	Unicellular	Present
Autumn-phytoplankton sp37	Eutrophic	Non-flagellated	Absent	Unicellular	Present
Autumn-phytoplankton sp38	Eutrophic	Non-flagellated	Absent	Unicellular	Present
Autumn-phytoplankton sp39	Oligotrophic	Non-flagellated	Absent	Unicellular	Present
Autumn-phytoplankton sp40	Eutrophic	Non-flagellated	Absent	Filamentous / Colonial chains	Present
Autumn-phytoplankton sp41	Eutrophic	Non-flagellated	Absent	Filamentous / Colonial chains	Present
Autumn-phytoplankton sp42	Mesotrophic	Non-flagellated	Absent	Unicellular	Present
Autumn-phytoplankton sp43	Mesotrophic	Non-flagellated	Absent	Unicellular	Present
Autumn-phytoplankton sp44	Mesotrophic	Non-flagellated	Absent	Unicellular	Present
Autumn-phytoplankton sp45	Mesotrophic	Non-flagellated	Absent	Unicellular	Present
Autumn-phytoplankton sp46	Mesotrophic	Non-flagellated	Present	Filamentous / Colonial chains	Present
Autumn-phytoplankton sp47	Eutrophic	Non-flagellated	Absent	Filamentous / Colonial chains	Present
Autumn-phytoplankton sp48	Eutrophic	Non-flagellated	Absent	Filamentous / Colonial chains	Present
Autumn-phytoplankton sp49	Eutrophic	Non-flagellated	Absent	Filamentous / Colonial chains	Present
Autumn-phytoplankton sp50	Mesotrophic	Non-flagellated	Absent	Unicellular	Present
Autumn-phytoplankton sp51	Eutrophic	Non-flagellated	Absent	Unicellular	Present
Autumn-phytoplankton sp52	Mesotrophic	Non-flagellated	Absent	Filamentous / Colonial chains	Present
Autumn-phytoplankton sp53	Eutrophic	Non-flagellated	Absent	Filamentous / Colonial chains	Present
Autumn-phytoplankton sp54	Oligotrophic	Flagellated	Absent	Unicellular	Absent
Autumn-phytoplankton sp55	Oligotrophic	Flagellated	Absent	Unicellular	Absent
Autumn-phytoplankton sp56	Mesotrophic	Non-flagellated	Absent	Unicellular	Absent
Autumn-phytoplankton sp57	Oligotrophic	Flagellated	Absent	Colonial	Absent
Autumn-phytoplankton sp58	Oligotrophic	Flagellated	Absent	Unicellular	Absent
Autumn-phytoplankton sp59	Oligotrophic	Flagellated	Absent	Unicellular	Absent
Autumn-phytoplankton sp60	Oligotrophic	Flagellated	Absent	Unicellular	Absent
Autumn-phytoplankton sp61	Mesotrophic	Non-flagellated	Absent	Unicellular	Absent
Autumn-phytoplankton sp62	Mesotrophic	Non-flagellated	Present	Colonial	Absent
Autumn-phytoplankton sp63	Mesotrophic	Flagellated	Absent	Colonial	Absent
Autumn-phytoplankton sp64	Oligotrophic	Flagellated	Absent	Unicellular	Absent
Autumn-phytoplankton sp65	Oligotrophic	Flagellated	Absent	Unicellular	Absent
Autumn-phytoplankton sp66	Oligotrophic	Flagellated	Absent	Unicellular	Absent
Autumn-phytoplankton sp67	Oligotrophic	Flagellated	Absent	Unicellular	Absent
Autumn-phytoplankton sp68	Oligotrophic	Flagellated	Absent	Unicellular	Absent
Autumn-phytoplankton sp69	Oligotrophic	Flagellated	Absent	Unicellular	Absent
Autumn-phytoplankton sp70	Oligotrophic	Flagellated	Absent	Unicellular	Absent
Autumn-phytoplankton sp71	Oligotrophic	Flagellated	Absent	Unicellular	Absent
Autumn-phytoplankton sp72	Oligotrophic	Flagellated	Absent	Unicellular	Absent
Autumn-phytoplankton sp73	Oligotrophic	Flagellated	Absent	Unicellular	Absent
Autumn-phytoplankton sp74	Mesotrophic	Flagellated	Absent	Unicellular	Absent
Autumn-phytoplankton sp75	Oligotrophic	Non-flagellated	Absent	Filamentous / Colonial chains	Absent
Autumn-phytoplankton sp76	Oligotrophic	Non-flagellated	Absent	Filamentous / Colonial chains	Absent
Autumn-phytoplankton sp77	Oligotrophic	Non-flagellated	Absent	Filamentous / Colonial chains	Absent
Autumn-phytoplankton sp78	Oligotrophic	Flagellated	Absent	Unicellular	Absent
Autumn-phytoplankton sp79	Oligotrophic	Non-flagellated	Present	Colonial	Absent
Autumn-phytoplankton sp80	Oligotrophic	Non-flagellated	Present	Colonial	Absent
Autumn-phytoplankton sp81	Oligotrophic	Non-flagellated	Present	Colonial	Absent
Autumn-phytoplankton sp82	Oligotrophic	Flagellated	Absent	Colonial	Absent
Autumn-phytoplankton sp83	Mesotrophic	Flagellated	Absent	Unicellular	Absent
Autumn-phytoplankton sp84	Mesotrophic	Flagellated	Absent	Unicellular	Absent
Autumn-phytoplankton sp85	Mesotrophic	Non-flagellated	Present	Colonial	Absent
Autumn-phytoplankton sp86	Mesotrophic	Non-flagellated	Absent	Filamentous / Colonial chains	Absent
Autumn-phytoplankton sp87	Mesotrophic	Non-flagellated	Absent	Filamentous / Colonial chains	Absent
Autumn-phytoplankton sp88	Mesotrophic	Non-flagellated	Absent	Filamentous / Colonial chains	Absent
Autumn-phytoplankton sp89	Mesotrophic	Non-flagellated	Absent	Filamentous / Colonial chains	Absent
Autumn-phytoplankton sp90	Mesotrophic	Non-flagellated	Absent	Filamentous / Colonial chains	Absent
Autumn-phytoplankton sp91	Mesotrophic	Non-flagellated	Absent	Filamentous / Colonial chains	Absent
Autumn-phytoplankton sp92	Mesotrophic	Non-flagellated	Present	Filamentous / Colonial chains	Absent
Autumn-phytoplankton sp93	Mesotrophic	Non-flagellated	Absent	Filamentous / Colonial chains	Absent
Autumn-phytoplankton sp94	Mesotrophic	Non-flagellated	Absent	Filamentous / Colonial chains	Absent
Autumn-phytoplankton sp95	Eutrophic	Non-flagellated	Absent	Filamentous / Colonial chains	Absent
Autumn-phytoplankton sp96	Eutrophic	Non-flagellated	Absent	Filamentous / Colonial chains	Absent
Autumn-phytoplankton sp97	Eutrophic	Non-flagellated	Present	Filamentous / Colonial chains	Absent
Autumn-phytoplankton sp98	Eutrophic	Non-flagellated	Absent	Filamentous / Colonial chains	Absent
Autumn-phytoplankton sp99	Mesotrophic	Non-flagellated	Present	Colonial	Absent
Autumn-phytoplankton sp100	Mesotrophic	Non-flagellated	Present	Colonial	Absent
Autumn-phytoplankton sp101	Eutrophic	Non-flagellated	Present	Filamentous / Colonial chains	Absent
Autumn-phytoplankton sp102	Eutrophic	Non-flagellated	Absent	Filamentous / Colonial chains	Absent
Autumn-phytoplankton sp103	Mesotrophic	Non-flagellated	Present	Colonial	Absent
Autumn-phytoplankton sp104	Eutrophic	Non-flagellated	Absent	Filamentous / Colonial chains	Absent
Autumn-phytoplankton sp105	Mesotrophic	Non-flagellated	Absent	Unicellular	Absent
Autumn-phytoplankton sp106	Mesotrophic	Non-flagellated	Absent	Unicellular	Absent
Autumn-phytoplankton sp107	Mesotrophic	Non-flagellated	Absent	Unicellular	Absent
Autumn-phytoplankton sp108	Mesotrophic	Non-flagellated	Absent	Unicellular	Absent
Autumn-phytoplankton sp109	Eutrophic	Non-flagellated	Present	Filamentous / Colonial chains	Absent
Autumn-phytoplankton sp110	Eutrophic	Non-flagellated	Present	Filamentous / Colonial chains	Absent
Autumn-phytoplankton sp111	Mesotrophic	Flagellated	Absent	Unicellular	Absent
Autumn-phytoplankton sp112	Mesotrophic	Flagellated	Absent	Unicellular	Absent
Autumn-phytoplankton sp113	Mesotrophic	Flagellated	Absent	Unicellular	Absent
Autumn-phytoplankton sp114	Mesotrophic	Flagellated	Absent	Unicellular	Absent
Autumn-phytoplankton sp115	Eutrophic	Flagellated	Absent	Unicellular	Absent
Autumn-phytoplankton sp116	Eutrophic	Flagellated	Absent	Unicellular	Absent
Autumn-phytoplankton sp117	Eutrophic	Flagellated	Absent	Unicellular	Absent
Autumn-phytoplankton sp118	Eutrophic	Flagellated	Absent	Unicellular	Absent
Autumn-phytoplankton sp119	Eutrophic	Flagellated	Absent	Unicellular	Absent
Autumn-phytoplankton sp120	Eutrophic	Flagellated	Absent	Unicellular	Absent
Autumn-phytoplankton sp121	Eutrophic	Flagellated	Absent	Unicellular	Absent
Autumn-phytoplankton sp122	Eutrophic	Flagellated	Absent	Unicellular	Absent
Autumn-phytoplankton sp123	Eutrophic	Flagellated	Absent	Unicellular	Absent
Autumn-phytoplankton sp124	Mesotrophic	Flagellated	Absent	Unicellular	Absent
Autumn-phytoplankton sp125	Mesotrophic	Flagellated	Absent	Unicellular	Absent
Autumn-phytoplankton sp126	Mesotrophic	Flagellated	Absent	Unicellular	Absent
Autumn-phytoplankton sp127	Mesotrophic	Flagellated	Absent	Unicellular	Absent
Autumn-phytoplankton sp128	Mesotrophic	Flagellated	Absent	Unicellular	Absent
Autumn-phytoplankton sp129	Mesotrophic	Non-flagellated	Present	Unicellular	Absent
Autumn-phytoplankton sp130	Eutrophic	Non-flagellated	Absent	Filamentous / Colonial chains	Absent
Autumn-phytoplankton sp131	Mesotrophic	Non-flagellated	Absent	Unicellular	Absent
Autumn-phytoplankton sp132	Mesotrophic	Non-flagellated	Absent	Colonial	Absent
Autumn-phytoplankton sp133	Mesotrophic	Non-flagellated	Absent	Colonial	Absent
Autumn-phytoplankton sp134	Mesotrophic	Non-flagellated	Absent	Colonial	Absent
Autumn-phytoplankton sp135	Mesotrophic	Non-flagellated	Absent	Colonial	Absent
Autumn-phytoplankton sp136	Mesotrophic	Non-flagellated	Absent	Filamentous / Colonial chains	Absent
Autumn-phytoplankton sp137	Mesotrophic	Non-flagellated	Absent	Filamentous / Colonial chains	Absent
Autumn-phytoplankton sp138	Eutrophic	Flagellated	Absent	Unicellular	Absent
Autumn-phytoplankton sp139	Eutrophic	Flagellated	Absent	Unicellular	Absent
Autumn-phytoplankton sp140	Eutrophic	Flagellated	Absent	Unicellular	Absent
Autumn-phytoplankton sp141	Mesotrophic	Non-flagellated	Absent	Unicellular	Absent
Autumn-phytoplankton sp142	Mesotrophic	Non-flagellated	Absent	Unicellular	Absent
Autumn-phytoplankton sp143	Mesotrophic	Non-flagellated	Absent	Colonial	Absent
Autumn-phytoplankton sp144	Mesotrophic	Non-flagellated	Present	Colonial	Absent
Autumn-phytoplankton sp145	Mesotrophic	Non-flagellated	Absent	Unicellular	Absent
Autumn-phytoplankton sp146	Mesotrophic	Non-flagellated	Absent	Unicellular	Absent
Autumn-phytoplankton sp147	Mesotrophic	Non-flagellated	Absent	Unicellular	Absent
Autumn-phytoplankton sp148	Oligotrophic	Non-flagellated	Absent	Unicellular	Absent
Autumn-phytoplankton sp149	Mesotrophic	Non-flagellated	Absent	Unicellular	Absent
Autumn-phytoplankton sp150	Eutrophic	Non-flagellated	Present	Unicellular	Absent
Autumn-phytoplankton sp151	Eutrophic	Non-flagellated	Present	Unicellular	Absent
Autumn-phytoplankton sp152	Oligotrophic	Non-flagellated	Absent	Unicellular	Absent
Autumn-phytoplankton sp153	Oligotrophic	Non-flagellated	Absent	Unicellular	Absent
Autumn-phytoplankton sp154	Mesotrophic	Non-flagellated	Absent	Unicellular	Absent
Autumn-phytoplankton sp155	Mesotrophic	Non-flagellated	Present	Colonial	Absent
Autumn-phytoplankton sp156	Mesotrophic	Non-flagellated	Absent	Colonial	Absent
Autumn-phytoplankton sp157	Mesotrophic	Non-flagellated	Absent	Filamentous / Colonial chains	Absent
Autumn-phytoplankton sp158	Mesotrophic	Non-flagellated	Absent	Filamentous / Colonial chains	Absent
Autumn-phytoplankton sp159	Mesotrophic	Non-flagellated	Absent	Filamentous / Colonial chains	Absent
Autumn-phytoplankton sp160	Mesotrophic	Non-flagellated	Absent	Filamentous / Colonial chains	Absent
Autumn-phytoplankton sp161	Mesotrophic	Non-flagellated	Absent	Colonial	Absent
Autumn-phytoplankton sp162	Eutrophic	Non-flagellated	Absent	Filamentous / Colonial chains	Absent
Autumn-phytoplankton sp163	Eutrophic	Non-flagellated	Absent	Filamentous / Colonial chains	Absent
Autumn-phytoplankton sp164	Mesotrophic	Non-flagellated	Absent	Filamentous / Colonial chains	Absent
Autumn-phytoplankton sp165	Mesotrophic	Non-flagellated	Present	Colonial	Absent
Autumn-phytoplankton sp166	Mesotrophic	Non-flagellated	Present	Colonial	Absent
Autumn-phytoplankton sp167	Mesotrophic	Flagellated	Absent	Unicellular	Absent
Autumn-phytoplankton sp168	Mesotrophic	Flagellated	Absent	Unicellular	Absent
Autumn-phytoplankton sp169	Mesotrophic	Non-flagellated	Absent	Unicellular	Present
Autumn-phytoplankton sp170	Eutrophic	Non-flagellated	Present	Filamentous / Colonial chains	Absent
Autumn-phytoplankton sp171	Mesotrophic	Flagellated	Present	Unicellular	Absent
Autumn-phytoplankton sp172	Mesotrophic	Flagellated	Absent	Unicellular	Absent
Autumn-phytoplankton sp173	Mesotrophic	Flagellated	Absent	Unicellular	Absent
Autumn-phytoplankton sp174	Mesotrophic	Flagellated	Absent	Unicellular	Absent
Autumn-phytoplankton sp175	Mesotrophic	Flagellated	Absent	Unicellular	Absent
Autumn-phytoplankton sp176	Mesotrophic	Flagellated	Absent	Unicellular	Absent
Autumn-phytoplankton sp177	Mesotrophic	Flagellated	Absent	Unicellular	Absent
Autumn-phytoplankton sp178	Mesotrophic	Flagellated	Absent	Unicellular	Absent
Autumn-phytoplankton sp179	Mesotrophic	Flagellated	Absent	Unicellular	Absent
Autumn-phytoplankton sp180	Eutrophic	Flagellated	Absent	Unicellular	Absent
Autumn-phytoplankton sp181	Mesotrophic	Flagellated	Absent	Unicellular	Absent
Autumn-phytoplankton sp182	Mesotrophic	Flagellated	Absent	Unicellular	Absent
Autumn-phytoplankton sp183	Mesotrophic	Flagellated	Absent	Unicellular	Absent
Autumn-phytoplankton sp184	Mesotrophic	Flagellated	Absent	Unicellular	Absent
Autumn-phytoplankton sp185	Mesotrophic	Flagellated	Absent	Unicellular	Absent
Autumn-phytoplankton sp186	Mesotrophic	Flagellated	Absent	Unicellular	Absent
Autumn-phytoplankton sp187	Mesotrophic	Flagellated	Absent	Unicellular	Absent
Autumn-phytoplankton sp188	Mesotrophic	Flagellated	Absent	Unicellular	Absent
Autumn-phytoplankton sp189	Mesotrophic	Flagellated	Absent	Unicellular	Absent
Autumn-phytoplankton sp190	Mesotrophic	Non-flagellated	Present	Colonial	Absent
Autumn-phytoplankton sp191	Mesotrophic	Non-flagellated	Present	Colonial	Absent
Autumn-phytoplankton sp192	Mesotrophic	Non-flagellated	Present	Colonial	Absent
Autumn-phytoplankton sp193	Mesotrophic	Non-flagellated	Absent	Unicellular	Absent
Autumn-phytoplankton sp194	Mesotrophic	Non-flagellated	Absent	Unicellular	Absent
Autumn-phytoplankton sp195	Mesotrophic	Non-flagellated	Absent	Unicellular	Absent
Autumn-phytoplankton sp196	Mesotrophic	Non-flagellated	Absent	Unicellular	Absent
Autumn-phytoplankton sp197	Mesotrophic	Non-flagellated	Present	Colonial	Absent
Autumn-phytoplankton sp198	Mesotrophic	Non-flagellated	Absent	Unicellular	Absent
Autumn-phytoplankton sp199	Mesotrophic	Non-flagellated	Absent	Unicellular	Absent
Autumn-phytoplankton sp200	Mesotrophic	Non-flagellated	Absent	Unicellular	Absent
Autumn-phytoplankton sp201	Eutrophic	Non-flagellated	Absent	Filamentous / Colonial chains	Absent
Autumn-phytoplankton sp202	Mesotrophic	Non-flagellated	Absent	Unicellular	Absent
Autumn-phytoplankton sp203	Mesotrophic	Flagellated	Absent	Unicellular	Absent
Autumn-phytoplankton sp204	Mesotrophic	Flagellated	Absent	Unicellular	Absent
Autumn-phytoplankton sp205	Oligotrophic	Flagellated	Absent	Unicellular	Absent
Autumn-phytoplankton sp206	Eutrophic	Non-flagellated	Absent	Filamentous / Colonial chains	Absent
Autumn-phytoplankton sp207	Mesotrophic	Flagellated	Absent	Unicellular	Absent
Autumn-phytoplankton sp208	Oligotrophic	Flagellated	Absent	Unicellular	Absent
Autumn-phytoplankton sp209	Mesotrophic	Flagellated	Absent	Unicellular	Absent
Autumn-phytoplankton sp210	Mesotrophic	Flagellated	Absent	Unicellular	Absent
Autumn-phytoplankton sp211	Mesotrophic	Flagellated	Absent	Unicellular	Absent
Autumn-phytoplankton sp212	Mesotrophic	Flagellated	Absent	Unicellular	Absent
Autumn-phytoplankton sp213	Mesotrophic	Flagellated	Absent	Unicellular	Absent
Autumn-phytoplankton sp214	Mesotrophic	Flagellated	Absent	Unicellular	Absent
Autumn-phytoplankton sp215	Mesotrophic	Flagellated	Absent	Unicellular	Absent
Autumn-phytoplankton sp216	Mesotrophic	Flagellated	Absent	Unicellular	Absent
Autumn-phytoplankton sp217	Mesotrophic	Flagellated	Absent	Unicellular	Absent
Autumn-phytoplankton sp218	Mesotrophic	Flagellated	Absent	Unicellular	Absent
Autumn-phytoplankton sp219	Mesotrophic	Flagellated	Absent	Unicellular	Absent
Autumn-phytoplankton sp220	Mesotrophic	Flagellated	Absent	Unicellular	Absent
Autumn-phytoplankton sp221	Mesotrophic	Flagellated	Absent	Unicellular	Absent
Autumn-phytoplankton sp222	Mesotrophic	Flagellated	Absent	Unicellular	Absent

## Sheet: Autumn zooplankton
	Feeding Type	Trophic Group	Reproductive Mode	Life Cycle Duration	Locomotion Mode
Autumun-zooplankton sp1	Filter-feeder	Omnivorous	Sexual	Long	Planktonic
Autumun-zooplankton sp2	Filter-feeder	Phytophagous / Herbivorous	Asexual	Short	Planktonic
Autumun-zooplankton sp3	Filter-feeder	Phytophagous / Herbivorous	Asexual	Short	Planktonic
Autumun-zooplankton sp4	Filter-feeder	Phytophagous / Herbivorous	Asexual	Short	Planktonic
Autumun-zooplankton sp5	Filter-feeder	Phytophagous / Herbivorous	Asexual	Short	Planktonic
Autumun-zooplankton sp6	Filter-feeder	Phytophagous / Herbivorous	Asexual	Short	Planktonic
Autumun-zooplankton sp7	Filter-feeder	Phytophagous / Herbivorous	Asexual	Short	Planktonic
Autumun-zooplankton sp8	Filter-feeder	Phytophagous / Herbivorous	Asexual	Short	Planktonic
Autumun-zooplankton sp9	Filter-feeder	Phytophagous / Herbivorous	Asexual	Short	Planktonic
Autumun-zooplankton sp10	Filter-feeder	Phytophagous / Herbivorous	Asexual	Short	Planktonic
Autumun-zooplankton sp11	Filter-feeder	Phytophagous / Herbivorous	Asexual	Short	Planktonic
Autumun-zooplankton sp12	Filter-feeder	Phytophagous / Herbivorous	Asexual	Short	Planktonic
Autumun-zooplankton sp13	Filter-feeder	Phytophagous / Herbivorous	Asexual	Short	Planktonic
Autumun-zooplankton sp14	Filter-feeder	Phytophagous / Herbivorous	Asexual	Short	Planktonic
Autumun-zooplankton sp15	Filter-feeder	Phytophagous / Herbivorous	Sexual	Long	Planktonic
Autumun-zooplankton sp16	Filter-feeder	Phytophagous / Herbivorous	Sexual	Long	Planktonic
Autumun-zooplankton sp17	Filter-feeder	Phytophagous / Herbivorous	Sexual	Long	Planktonic
Autumun-zooplankton sp18	Carnivore	Omnivorous	Sexual	Long	Planktonic
Autumun-zooplankton sp19	Carnivore	Omnivorous	Sexual	Long	Planktonic
Autumun-zooplankton sp20	Carnivore	Carnivorous	Sexual	Long	Planktonic
Autumun-zooplankton sp21	Carnivore	Carnivorous	Sexual	Long	Planktonic
Autumun-zooplankton sp22	Carnivore	Carnivorous	Sexual	Long	Planktonic
Autumun-zooplankton sp23	Carnivore	Carnivorous	Sexual	Long	Planktonic
Autumun-zooplankton sp24	Carnivore	Carnivorous	Sexual	Long	Planktonic
Autumun-zooplankton sp25	Carnivore	Carnivorous	Sexual	Long	Planktonic
Autumun-zooplankton sp26	Predator	Omnivorous	Sexual	Long	Planktonic
Autumun-zooplankton sp27	Predator	Omnivorous	Sexual	Long	Planktonic
Autumun-zooplankton sp28	Filter-feeder	Phytophagous / Herbivorous	Asexual	Short	Planktonic
Autumun-zooplankton sp29	Predator	Carnivorous	Asexual	Short	Attached
Autumun-zooplankton sp30	Filter-feeder	Omnivorous	Asexual	Short	Planktonic
Autumun-zooplankton sp31	Filter-feeder	Phytophagous / Herbivorous	Asexual	Short	Planktonic
Autumun-zooplankton sp32	Filter-feeder	Phytophagous / Herbivorous	Asexual	Short	Planktonic
Autumun-zooplankton sp33	Predator	Carnivorous	Asexual	Short	Planktonic
Autumun-zooplankton sp34	Predator	Carnivorous	Asexual	Short	Planktonic
Autumun-zooplankton sp35	Filter-feeder	Phytophagous / Herbivorous	Asexual	Short	Planktonic
Autumun-zooplankton sp36	Filter-feeder	Phytophagous / Herbivorous	Asexual	Short	Facultatively Planktonic
Autumun-zooplankton sp37	Filter-feeder	Phytophagous / Herbivorous	Asexual	Short	Facultatively Planktonic
Autumun-zooplankton sp38	Filter-feeder	Phytophagous / Herbivorous	Asexual	Short	Facultatively Planktonic
Autumun-zooplankton sp39	Filter-feeder	Phytophagous / Herbivorous	Asexual	Short	Facultatively Planktonic
Autumun-zooplankton sp40	Filter-feeder	Phytophagous / Herbivorous	Asexual	Short	Facultatively Planktonic
Autumun-zooplankton sp41	Filter-feeder	Phytophagous / Herbivorous	Asexual	Short	Facultatively Planktonic
Autumun-zooplankton sp42	Filter-feeder	Phytophagous / Herbivorous	Asexual	Short	Planktonic
Autumun-zooplankton sp43	Filter-feeder	Phytophagous / Herbivorous	Asexual	Short	Planktonic
Autumun-zooplankton sp44	Filter-feeder	Phytophagous / Herbivorous	Asexual	Short	Planktonic
Autumun-zooplankton sp45	Filter-feeder	Phytophagous / Herbivorous	Asexual	Short	Planktonic
Autumun-zooplankton sp46	Filter-feeder	Phytophagous / Herbivorous	Asexual	Short	Planktonic
Autumun-zooplankton sp47	Filter-feeder	Phytophagous / Herbivorous	Asexual	Short	Planktonic
Autumun-zooplankton sp48	Filter-feeder	Phytophagous / Herbivorous	Asexual	Short	Planktonic
Autumun-zooplankton sp49	Filter-feeder	Omnivorous	Asexual	Short	Facultatively Planktonic
Autumun-zooplankton sp50	Predator	Phytophagous / Herbivorous	Sexual	Short	Facultatively Planktonic
Autumun-zooplankton sp51	Predator	Carnivorous	Asexual	Short	Facultatively Planktonic
Autumun-zooplankton sp52	Predator	Carnivorous	Asexual	Short	Facultatively Planktonic
Autumun-zooplankton sp53	Filter-feeder	Omnivorous	Asexual	Short	Planktonic
Autumun-zooplankton sp54	Suctorian	Omnivorous	Asexual	Short	Planktonic
Autumun-zooplankton sp55	Suctorian	Omnivorous	Asexual	Short	Planktonic
Autumun-zooplankton sp56	Suctorian	Omnivorous	Asexual	Short	Planktonic
Autumun-zooplankton sp57	Suctorian	Omnivorous	Asexual	Short	Planktonic
Autumun-zooplankton sp58	Suctorian	Omnivorous	Asexual	Short	Planktonic
Autumun-zooplankton sp59	Suctorian	Omnivorous	Asexual	Short	Planktonic
Autumun-zooplankton sp60	Suctorian	Omnivorous	Asexual	Short	Planktonic
Autumun-zooplankton sp61	Suctorian	Omnivorous	Asexual	Short	Planktonic
Autumun-zooplankton sp62	Suctorian	Omnivorous	Asexual	Short	Planktonic
Autumun-zooplankton sp63	Suctorian	Omnivorous	Asexual	Short	Planktonic
Autumun-zooplankton sp64	Suctorian	Omnivorous	Asexual	Short	Planktonic
Autumun-zooplankton sp65	Suctorian	Omnivorous	Asexual	Short	Planktonic
Autumun-zooplankton sp66	Suctorian	Omnivorous	Asexual	Short	Planktonic
Autumun-zooplankton sp67	Suctorian	Omnivorous	Asexual	Short	Planktonic
Autumun-zooplankton sp68	Suctorian	Omnivorous	Asexual	Short	Planktonic
Autumun-zooplankton sp69	Carnivore	Omnivorous	Asexual	Short	Planktonic
Autumun-zooplankton sp70	Carnivore	Omnivorous	Asexual	Short	Planktonic
Autumun-zooplankton sp71	Carnivore	Omnivorous	Asexual	Short	Planktonic
Autumun-zooplankton sp72	Carnivore	Omnivorous	Asexual	Short	Planktonic
Autumun-zooplankton sp73	Carnivore	Omnivorous	Asexual	Short	Planktonic
Autumun-zooplankton sp74	Carnivore	Omnivorous	Asexual	Short	Planktonic
Autumun-zooplankton sp75	Carnivore	Omnivorous	Asexual	Short	Planktonic
Autumun-zooplankton sp76	Carnivore	Omnivorous	Asexual	Short	Planktonic
Autumun-zooplankton sp77	Filter-feeder	Omnivorous	Asexual	Short	Planktonic
Autumun-zooplankton sp78	Predator	Omnivorous	Asexual	Short	Facultatively Planktonic

## Sheet: Autumn  macroinvertebrates
	Life	Size at maturity	Occu/Drft	Swim	Rheo	Temp/ther	Resp	Feed/trop	Habi	Adult aerial dispersal	Armouring		Life			Size at maturity			Occu/Drft			Swim				Rheo			Temp/ther			Resp			Feed/trop						Habi						Adult aerial dispersal		Armouring
Autumn-benthic macroinvertebrates sp1	1	1	3	4	1	2	2	1	1	1	1		<1 week	<1 month	>1 month	Small (< 9 mm)	Medium (9-16 mm)	Large(> 16 mm)	Rare	Common	Abundant	Weak	Medium	Strong	None	Depositional only	Depositional and erosional	Erosional	Cool	Cool/warm eurythermal	Warm	tegumentary	Branchial	Air(spiracles,tracheae, plastrons)	Collector-gatherers	Collector-filterers	Scrapers	Predators	Shredders	Deposit feeder	Climbers	Burrowers	Sprawlers	Clingers	Swimmers	Skate	Yes	No	None (soft-bodied forms)
Autumn-benthic macroinvertebrates sp2	1	1	3	4	2	1	1	1	1	1	1
Autumn-benthic macroinvertebrates sp3	2	2	3	4	1	2	1	1	1	1	1
Autumn-benthic macroinvertebrates sp4	1	1	3	4	1	2	2	1	1	1	1
Autumn-benthic macroinvertebrates sp5	2	1	3	4	2	1	1	1	1	1	1
Autumn-benthic macroinvertebrates sp6	3	1	4	4	1	2	1	2	4	2	1
Autumn-benthic macroinvertebrates sp7	3	1	4	4	1	2	1	2	4	2	1
Autumn-benthic macroinvertebrates sp8	3	1	1	2	1	2	1	4	4	2	1
Autumn-benthic macroinvertebrates sp9	3	1	1	2	1	2	1	4	4	2	1
Autumn-benthic macroinvertebrates sp10	3	3	1	1	1	2	2	2	3	2	3
Autumn-benthic macroinvertebrates sp11	3	3	1	4	1	2	2	1	2	2	3
Autumn-benthic macroinvertebrates sp12	3	3	1	1	1	3	2	2	3	2	3
Autumn-benthic macroinvertebrates sp13	3	3	1	1	1	3	2	3	1	2	3
Autumn-benthic macroinvertebrates sp14	3	3	1	4	1	3	3	3	4	2	3
Autumn-benthic macroinvertebrates sp15	3	3	1	4	1	3	2	3	1	2	3
Autumn-benthic macroinvertebrates sp16	1	1	1	1	1	2	1	4	3	2	1
Autumn-benthic macroinvertebrates sp17	1	1	1	1	1	2	1	4	3	2	1
[truncated: 2 more columns]
